# Supplementary material for: Vibrio cholerae ensures function of host proteins required for virulence through consumption of luminal methionine sulfoxide
Source: PubMed Central journal article supplement (PMC5473594; doi:10.1371/journal.ppat.1006428), 2017-06-06

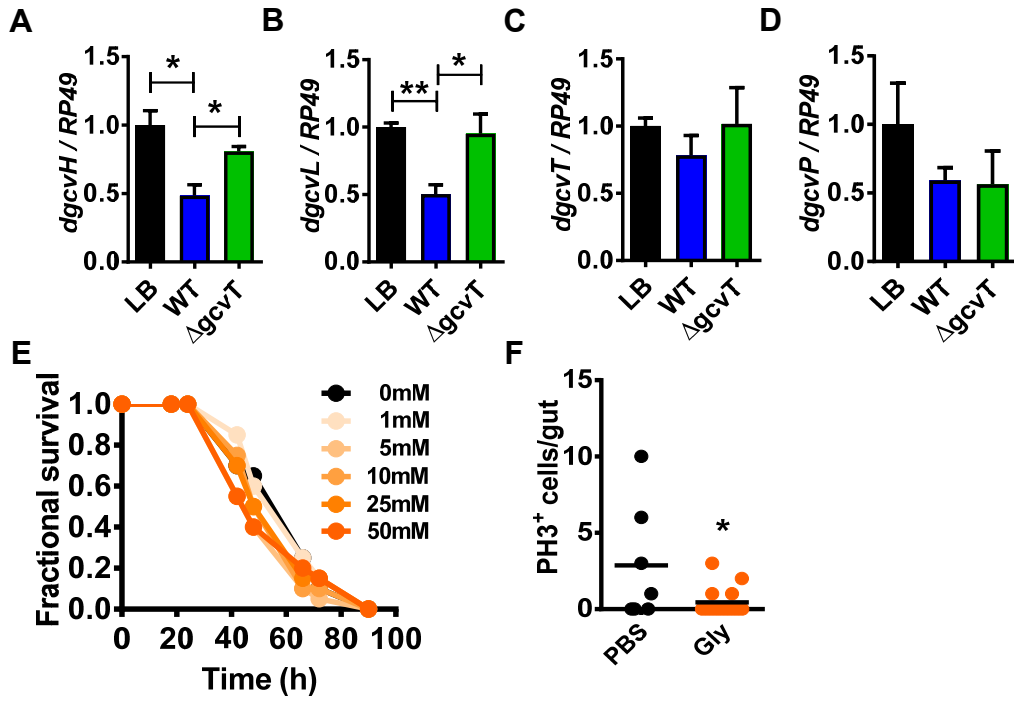

Supplement: ppat.1006428.s002.pdf [file ppat.1006428.s002.pdf]
