# Supplementary material for: Vibrio cholerae ensures function of host proteins required for virulence through consumption of luminal methionine sulfoxide
Source: PubMed Central journal article supplement (PMC5473594; doi:10.1371/journal.ppat.1006428), 2017-06-06
Supplement: ppat.1006428.s016.pdf [file ppat.1006428.s016.pdf]

**S7 Table. Fly strains.**

| Description                         | Genotype                                                  | Gene   | Reference        | Flybase ID  |
|-------------------------------------|-----------------------------------------------------------|--------|------------------|-------------|
| Wild type strains                   |                                                           |        |                  |             |
| OregonR                             |                                                           |        | Laboratory stock |             |
| yw                                  | y1w1                                                      |        | BDRC (1495)      | FBst0001495 |
| Transposon insertion mutant strains |                                                           |        |                  |             |
| MsrA <sup>EY05753</sup>             | y[1] w[67c23]; P{w[+mC] y[+mDint2]=EPgy2}Eip71CD[EY05753] | CG7266 | BDRC (16671)     | FBst0016671 |
| MsrA <sup>MI14018</sup>             | y[1] w[*]; Mi{y[+mDint2]=MIC}Eip71CD[MI14018]             | CG7266 | BDRC (59248)     | FBst0059248 |
| UAS-RNAi strain                     |                                                           |        |                  |             |
| <i>msrA</i> <sup>RNAi</sup>         | w[1118]; P{GD17043}v48990/TM3                             | CG7266 | VDRC (v48990)    | FBst0468225 |
| Drivers                             |                                                           |        |                  |             |
| NP1-Gal4                            | NP1-Gal4 (II)                                             |        | [1]              |             |
| Da-Gal4                             | w[1118]; P{da-GAL4.w[-]}3                                 |        | [2]              |             |
| Act-Gal4                            | yw; act5cGal4/TM6B, Tb                                    |        | [3]              |             |

BDRC: Bloomington Drosophila Stock Center

VDRC: Vienna Drosophila Resource Center
