# Supplementary material for: Vibrio cholerae ensures function of host proteins required for virulence through consumption of luminal methionine sulfoxide
Source: PubMed Central journal article supplement (PMC5473594; doi:10.1371/journal.ppat.1006428), 2017-06-06
Supplement: ppat.1006428.s017.pdf [file ppat.1006428.s017.pdf]

**S8 Table. Strains, plasmids and oligonucleotides.**

| Description/sequence               | Reference                                                                                                |                   |
|------------------------------------|----------------------------------------------------------------------------------------------------------|-------------------|
| <b>Bacterial strains</b>           |                                                                                                          |                   |
| PW724                              | <i>V. cholerae</i> MO10; Sm <sup>r</sup>                                                                 | [4]               |
| PW1640                             | MO10 $\Delta gcvT$ ; Sm <sup>r</sup>                                                                     | This study        |
| PW1658                             | MO10 $\Delta gcvP$ ; Sm <sup>r</sup>                                                                     | This study        |
| PW1695                             | MO10 $\Delta VC2638$ ; Sm <sup>r</sup>                                                                   | This study        |
| PW1698                             | MO10 $\Delta gcvH$ ; Sm <sup>r</sup>                                                                     | This study        |
| PW1692                             | MO10 $\Delta glyA 1\Delta glyA2$ ; Sm <sup>r</sup>                                                       | This study        |
| PW1405                             | MO10 $\Delta acs1$ ; Sm <sup>r</sup>                                                                     | [5]               |
| SM10 $\lambda$ pir                 | <i>E. coli</i> thi thr leu tonA lacY supE recA::RP4-2-Tc::Mu ( $\lambda$ pirR6K) Km <sup>r</sup>         | [6]               |
| <b>Plasmids</b>                    |                                                                                                          |                   |
| pWM91                              | oriR6K mobRP4 <i>lacI</i> pTac <i>tnp</i> mini-Tn10; Km <sup>r</sup> Ap <sup>r</sup>                     | [7]               |
| pWM91:: $\Delta gcvT$              | pWM91 carrying an unmarked, in-frame deletion in VCA0280 ( <i>gcvT</i> ); Ap <sup>r</sup>                | This study        |
| pWM91:: $\Delta gcvP$              | pWM91 carrying an unmarked, in-frame deletion in VCA0276 ( <i>gcvP</i> ); Ap <sup>r</sup>                | This study        |
| pWM91:: $\Delta VC2638$            | pWM91 carrying an unmarked, in-frame deletion in VC2638; Ap <sup>r</sup>                                 | This study        |
| pWM91:: $\Delta gcvH$              | pWM91 carrying an unmarked, in-frame deletion in VCA0277 ( <i>gcvH</i> ); Ap <sup>r</sup>                | This study        |
| pWM91:: $\Delta glyA1\Delta glyA2$ | pWM91 carrying an unmarked, in-frame deletion in VCA0941/VCA0278 ( <i>glyA1/glyA2</i> ); Ap <sup>r</sup> | This study        |
| pBAD-TOPO                          | arabinose inducible expression vector used to generate His6/V5 epitope tagged proteins; Ap <sup>r</sup>  | Life Technologies |
| pBAD-TOPO- <i>lacZ</i>             | pBAD-TOPO control vector containing <i>lacZ</i> gene; Ap <sup>r</sup>                                    | Life Technologies |
| pBAD-TOPO- <i>gcvT</i>             | pBAD-TOPO containing <i>gcvT</i> gene; Ap <sup>r</sup>                                                   | This study        |
| <b>Oligonucleotides</b>            |                                                                                                          |                   |
| <b>Mutagenesis</b>                 |                                                                                                          |                   |
| $\Delta VCA0280$                   |                                                                                                          |                   |
| <i>gcvT</i> #1                     | 5'-CCGCTCGAGGCGAATTTTATGAGCCGTA-3'                                                                       | This study        |
| <i>gcvT</i> #2                     | 5'-TAACGAGCGGCCGCATAGCGGTGTCGTCAGTAAGGT-3'                                                               | This study        |
| <i>gcvT</i> #3                     | 5'-TGCGGCCGCTCGTTAGGGAAGATGCTGCCAATGACT-3'                                                               | This study        |
| <i>gcvT</i> #4                     | 5'-GGACTAGTGGACTTTTTGTGGAGGTTGG-3'                                                                       | This study        |
| $\Delta VCA0276$                   |                                                                                                          |                   |
| <i>gcvP</i> #1                     | 5'-CCGCTCGAGCACTGGTTGAGTCGGTGAAA-3'                                                                      | This study        |
| <i>gcvP</i> #2                     | 5'-TAACGAGCGGCCGCAGCGTGCAACGAACCTATTTG-3'                                                                | This study        |
| <i>gcvP</i> #3                     | 5'-TGCGGCCGCTCGTTAAAATACTGGCCAACGGTGAAC-3'                                                               | This study        |
| <i>gcvP</i> #4                     | 5'-GGACTAGTTACTTTGGGCGGAATTATCG-3'                                                                       | This study        |
| $\Delta VC2638$                    |                                                                                                          |                   |
| VC2638#1                           | 5'-CCGCTCGAGTGTTTATCGAACCGAATGAGC-3'                                                                     | This study        |
| VC2638#2                           | 5'-TAACGAGCGGCCGCAGGCGACATCAACGTGAATCTG-3'                                                               | This study        |
| VC2638#3                           | 5'-TGCGGCCGCTCGTTAGGCCCTGAGATGATCAAAC-3'                                                                 | This study        |
| VC2638#4                           | 5'-GGACTAGTTAAAGCCCCAAAACCAAATG-3'                                                                       | This study        |
| $\Delta VCA0277$                   |                                                                                                          |                   |
| <i>gcvH</i> #1                     | 5'-CCGCTCGAGCGGATACGCATCTCATGTTG-3'                                                                      | This study        |
| <i>gcvH</i> #2                     | 5'-TAACGAGCGGCCGCAAACCCATTATGGCTTTCTG-3'                                                                 | This study        |
| <i>gcvH</i> #3                     | 5'-TGCGGCCGCTCGTTAAAAGACGCGGAAGAGTACC-3'                                                                 | This study        |
| <i>gcvH</i> #4                     | 5'-GGACTAGTTTCATCGTTGCCAGCATATC-3'                                                                       | This study        |
| $\Delta VCA0941$                   |                                                                                                          |                   |
| <i>glyA1</i> #1                    | 5'-CCGCTCGAGCAGAATCGCGATCCAATCTT-3'                                                                      | This study        |
| <i>glyA1</i> #2                    | 5'-TAACGAGCGGCCGCATTCCTGAATGGCAGCGTAT-3'                                                                 | This study        |
| <i>glyA1</i> #3                    | 5'-TGCGGCCGCTCGTTAGTGATTGAAGCGACGAAAC-3'                                                                 | This study        |
| <i>glyA1</i> #4                    | 5'-GGACTAGTATGATGGCCAAGTACGCATT-3'                                                                       | This study        |
| $\Delta VCA0278$                   |                                                                                                          |                   |
| <i>glyA2</i> #1                    | 5'-CCGCTCGAGATTGTGGCATGAAGCGATTT-3'                                                                      | This study        |
| <i>glyA2</i> #2                    | 5'-TAACGAGCGGCCGCACGCCAGTGGGGTAGAGAAGAA-3'                                                               | This study        |
| <i>glyA2</i> #3                    | 5'-TGCGGCCGCTCGTTAGACGTTGAGCAACAAGTGC-3'                                                                 | This study        |
| <i>glyA2</i> #4                    | 5'-GGACTAGTCGGACATTTTCACTTTCACG-3'                                                                       | This study        |
| <b>Complementation</b>             |                                                                                                          |                   |
| <i>gcvT</i> -Fc                    | 5'-GAGGAATAATAAATGACTGAACAACACGAAAC-3'                                                                   | This study        |
| <i>gcvT</i> -Rc                    | 5'-TGCTCCGCGATAATAACGCT-3'                                                                               | This study        |
