# Supplementary material for: Vibrio cholerae ensures function of host proteins required for virulence through consumption of luminal methionine sulfoxide
Source: PubMed Central journal article supplement (PMC5473594; doi:10.1371/journal.ppat.1006428), 2017-06-06
Supplement: ppat.1006428.s018.pdf [file ppat.1006428.s018.pdf]

**S9 Table. Oligonucleotides for qPCR**

| Primers  | Sequence                     | Description                                         | Reference  |
|----------|------------------------------|-----------------------------------------------------|------------|
| dmsrA-Fw | 5'-CAAGGATCTGAGCACCGTTTCG-3' | Ecdysone-induced protein 28/29kD (Eip71CD) - CG7266 | [8]        |
| dmsrA-Rv | 5'-GGTACGTTGGCAAATCCGAGC-3'  |                                                     |            |
| dgcvH-Fw | 5'-CGGTTGGAAAATTCATCTCG-3'   | pumpless (gcvH) - CG7758                            | This study |
| dgcvH-Rv | 5'-CCCACTCGTGTGTTGTTGTG-3'   |                                                     |            |
| dgcvT-Fw | 5'-CCAGGGAAAAGACGTATCCA-3'   | glycine cleavage system T (gcvT) - CG6415           | This study |
| dgcvT-Rv | 5'-CGGTGTAACCACATCTCGTG-3'   |                                                     |            |
| dgcvP-Fw | 5'-GATGATCGAGCCCACTGAAT-3'   | glycine cleavage system P (gcvP) - CG3999           | This study |
| dgcvP-Rv | 5'-AGCCTGCTCCCGTGATATG-3'    |                                                     |            |
| dgcvL-Fw | 5'-CTTTGGCAAACCATCAACT-3'    | glycine cleavage system P (gcvL) - CG7430           | This study |
| dgcvL-Rv | 5'-CTGGCGCCATTACCATTATT-3'   |                                                     |            |
| RP49-Fw  | 5'-TACAGGCCCAAGATCGTGAA-3'   | Ribosomal protein L32 (rpl32) - CG7939              | [9]        |
| RP49-Rv  | 5'-TCTCCTTGCGCTTCTTGGA-3'    |                                                     |            |
