# Supplementary material for: Vibrio cholerae ensures function of host proteins required for virulence through consumption of luminal methionine sulfoxide
Source: PubMed Central journal article supplement (PMC5473594; doi:10.1371/journal.ppat.1006428), 2017-06-06
Supplement: ppat.1006428.s019.pdf [file ppat.1006428.s019.pdf]

## S1 References. Supporting references list

1. Morgan NS, Skovronsky DM, Artavanis-Tsakonas S, Mooseker MS. The molecular cloning and characterization of *Drosophila melanogaster* myosin-IA and myosin-IB. *J Mol Biol.* 1994;239(3):347-56. Epub 1994/06/10. doi: S0022-2836(84)71376-3 [pii]10.1006/jmbi.1994.1376. PubMed PMID: 8201616.
2. Wodarz A, Hinz U, Engelbert M, Knust E. Expression of crumbs confers apical character on plasma membrane domains of ectodermal epithelia of *Drosophila*. *Cell.* 1995;82(1):67-76. Epub 1995/07/14. doi: 0092-8674(95)90053-5 [pii]. PubMed PMID: 7606787.
3. Ito K, Awano W, Suzuki K, Hiromi Y, Yamamoto D. The *Drosophila* mushroom body is a quadruple structure of clonal units each of which contains a virtually identical set of neurons and glial cells. *Development.* 1997;124(4):761-71. Epub 1997/02/01. PubMed PMID: 9043058.
4. Waldor MK, Mekalanos JJ. Emergence of a new cholera pandemic: molecular analysis of virulence determinants in *Vibrio cholerae* O139 and development of a live vaccine prototype. *J Infect Dis.* 1994;170(2):278-83. Epub 1994/08/01. PubMed PMID: 8035010.
5. Hang S, Purdy AE, Robins WP, Wang Z, Mandal M, Chang S, et al. The acetate switch of an intestinal pathogen disrupts host insulin signaling and lipid metabolism. *Cell Host Microbe.* 2014;16(5):592-604. Epub 2014/12/20. doi: 10.1016/j.chom.2014.10.006 S1931-3128(14)00384-9 [pii]. PubMed PMID: 25525791; PubMed Central PMCID: PMC4272434.
6. Miller VL, Mekalanos JJ. A novel suicide vector and its use in construction of insertion mutations: osmoregulation of outer membrane proteins and virulence determinants in *Vibrio cholerae* requires *toxR*. *J Bacteriol.* 1988;170(6):2575-83. Epub 1988/06/01. PubMed PMID: 2836362; PubMed Central PMCID: PMC211174.
7. Metcalf WW, Jiang W, Daniels LL, Kim SK, Haldimann A, Wanner BL. Conditionally replicative and conjugative plasmids carrying *lacZ* alpha for cloning, mutagenesis, and allele replacement in bacteria. *Plasmid.* 1996;35(1):1-13. Epub 1996/01/01. doi: S0147-619X(96)90001-3 [pii] 10.1006/plas.1996.0001. PubMed PMID: 8693022.
8. Chung H, Kim AK, Jung SA, Kim SW, Yu K, Lee JH. The *Drosophila* homolog of methionine sulfoxide reductase A extends lifespan and increases nuclear localization of FOXO. *FEBS Lett.* 2010;584(16):3609-14. Epub 2010/07/27. doi: 10.1016/j.febslet.2010.07.033 S0014-5793(10)00591-0 [pii]. PubMed PMID: 20655917.
9. LaLonde M, Janssens H, Yun S, Crosby J, Redina O, Olive V, et al. A role for Phospholipase D in *Drosophila* embryonic cellularization. *BMC Dev Biol.* 2006;6:60. Epub

2006/12/13. doi: 1471-213X-6-60 [pii]10.1186/1471-213X-6-60. PubMed PMID: 17156430;  
PubMed Central PMCID: PMC1698916.
