# Supplementary material for: Vibrio cholerae ensures function of host proteins required for virulence through consumption of luminal methionine sulfoxide
Source: PLoS Pathog. 2017 Jun 6;13(6):e1006428. doi: 10.1371/journal.ppat.1006428 (PMC5473594; doi:10.1371/journal.ppat.1006428)
Supplement: S4 Table — (XLSX) [file ppat.1006428.s013.xlsx]

## Sheet: Sheet1
S4 Table. Lipidomic analysis of the intestines of flies fed with LB broth alone or inoculated with wild-type V. cholerae or a Δacs1 mutant (normalized by sum).
Lipids	LB1	LB2	LB3	WT1	WT2	WT3	WT4	Δacs1	Δacs2	Δacs3	Δacs4
CL56	5.47929e-08	4.31147e-08	4.23054e-08	4.92e-08	5.18543e-08	5.7857e-08	0.000164861	4.72032e-08	0.000158713	4.47173e-08	5.20745e-08
CL58	0.00581641	0.0105046	0.00323102	0.000929391	0.000492006	0.000507809	6.62479e-08	0.00265512	0.000663441	0.00167083	0.00221742
CL60	0.0190256	0.0305702	0.014813	0.00292182	0.00251207	0.0018625	6.62479e-08	0.00618607	0.00410646	0.00468245	0.0120038
CL62	0.0404493	0.0685627	0.0257376	0.0172271	0.0197452	0.0175832	0.00428322	0.0182496	0.0132999	0.0184629	0.0303134
CL64	0.481235	0.362313	0.290088	0.254818	0.304878	0.255762	0.13048	0.586743	0.263148	0.195067	0.34416
CL65	0.00539991	0.000888013	0.0076534	0.00600494	0.00612921	0.00911626	0.0040535	0.00684029	0.00223737	0.00354023	0.00858501
CL66	0.989562	0.805141	0.896481	1.09823	0.900261	0.998204	0.465487	0.601205	0.609587	1.12865	0.88889
CL67	0.0066869	0.00551125	0.0158623	0.0113412	0.00900261	0.0144341	0.00466214	0.0134978	0.00554758	0.010895	0.00957267
CL68	0.999243	0.962395	0.814716	1.57515	1.45282	1.02136	0.479092	1.19139	0.566131	1.29175	1.03018
CL69	0.00788421	0.0159178	0.0183965	0.0306862	0.0245223	0.0220043	0.00894278	0.0271711	0.00870479	0.0326262	0.0264072
CL70	1.03241	1.64653	1.03882	2.44108	1.79495	1.87945	0.809039	1.69822	1.50511	2.04419	1.80818
CL71	0.0011462	0.00503667	0.00310902	0.00568545	0.00459584	0.00725359	0.00141428	0.00667203	0.00326886	0.00184551	0.00418416
CL72	0.111706	0.303186	0.0993707	0.430679	0.315469	0.177261	0.116094	0.282353	0.252284	0.323589	0.202849
Cerd20	9.59976e-07	0.00268583	4.23054e-08	0.000344959	0.00123103	0.000225583	1.40764e-06	0.00462787	5.75081e-05	0.000299296	0.000422988
Cerd31	3.53366e-06	0.00206582	1.64688e-06	0.0201701	5.18543e-08	5.7857e-08	0.00121921	4.72032e-08	0.000525332	0.0168319	5.20745e-08
Cerd32	0.00105698	0.0310734	0.0236391	0.0535477	0.0412304	0.0507303	0.0114049	0.0174232	0.000901921	0.0363386	0.0324407
Cerd33	5.47929e-08	4.31147e-08	1.65114e-05	0.0676107	5.18543e-08	5.7857e-08	0.00542446	4.72032e-08	3.46531e-05	0.0506688	5.20745e-08
Cerd34	0.260054	0.310005	0.246332	0.370619	0.366253	0.305924	0.29358	0.310972	0.218372	0.162205	0.265669
Cerd35	0.134298	0.335266	0.117887	0.00379343	0.430461	0.297123	0.198136	0.216241	0.191929	0.314456	0.288699
Cerd36	0.799106	1.60839	0.821929	2.33858	2.03001	1.88449	1.72475	1.55743	1.42119	0.605856	1.38381
Cerd37	0.0366922	0.0855462	0.0387607	0.14356	0.0975913	0.0670214	0.0464894	0.0267202	0.0290912	0.102426	0.0697437
Cerd38	0.0877982	0.252235	0.146896	0.328033	0.325304	0.307252	0.289137	0.270645	0.278237	0.228992	0.264388
Cerd40	0.00241817	0.00729659	0.00179462	0.0134946	0.0562096	0.0119018	0.00913774	0.0104677	0.00437539	0.0133742	0.0388985
Cerd42	0.0197118	0.00406698	0.0011026	0.0292861	0.109696	0.0141333	0.0145944	0.0162525	0.00857533	0.0375781	0.088889
Cerd44	0.00724936	0.00893203	0.0016989	0.00367213	0.0569661	0.0157002	0.00881606	0.0157704	0.00458183	0.0122651	0.0505224
CerG1d32	0.430873	0.500068	0.141341	0.488102	0.535617	0.340172	0.0188471	0.414576	0.162355	0.433192	0.480153
CerG1d34	1.20709	1.34609	0.808544	1.32793	1.14991	0.869421	0.104384	0.874605	0.772546	1.10908	1.10162
CerG1d35	0.0398898	0.00141763	0.0950502	0.0472311	0.0506869	0.0263359	0.113082	0.0410444	0.0977753	0.0381	0.0363913
CerG1d36	1.25053	0.286202	1.28603	0.256101	0.255406	0.23339	0.256127	0.221693	0.210036	0.207174	0.230211
CerG1d38	0.00110509	0.0673047	0.000500142	0.105516	0.0824608	0.0691316	0.0402071	0.0484132	0.0440592	0.10895	0.0749099
DG16	0.0251809	0.00473663	0.000230821	0.0861357	0.0332113	0.032751	6.62479e-08	0.0327116	0.000158501	0.0822021	0.0360874
DG17	0.00638245	0.336524	0.000271426	0.0760865	3.26061	0.0128303	6.62479e-08	0.0133601	4.13692e-08	0.0493213	2.61349
DG18	0.000973993	0.00067066	0.00081789	0.183756	0.00357464	0.0017358	0.00326038	0.000787996	0.00105461	0.310541	0.000787374
DG19	5.47929e-08	4.31147e-08	4.23054e-08	0.0275634	0.000299091	5.7857e-08	6.62479e-08	4.72032e-08	4.13692e-08	0.047625	0.0005756
DG20	5.47929e-08	4.31147e-08	4.23054e-08	3.35329e-05	5.18543e-08	5.7857e-08	6.62479e-08	4.72032e-08	0.000320919	0.00270265	5.20745e-08
DG21	5.47929e-08	0.000256055	4.23054e-08	0.15648	5.18543e-08	5.7857e-08	6.62479e-08	4.72032e-08	4.13692e-08	0.0952501	5.20745e-08
DG23	0.00679009	0.00426836	5.93028e-05	0.00290778	0.0309827	0.00477921	0.0643321	0.0522792	0.0393056	0.0161524	0.00879222
DG24	1.09219	1.03919	0.734479	0.367361	0.113271	0.565334	0.0937027	0.38337	0.261185	0.192255	0.240895
DG25	0.00401465	0.010215	0.0168351	0.0264996	0.0784892	0.00763867	0.103211	0.108145	0.0557747	0.0339509	0.0272171
DG26	1.23549	0.750408	1.10554	0.363206	0.214852	0.495481	0.310655	0.521258	0.390875	0.316413	0.38159
DG27	0.117511	0.135867	0.00101574	0.245487	0.233009	0.0344266	0.00617885	0.0598908	0.0282119	0.180062	0.129155
DG28	1.90546	1.56625	0.703809	0.983383	0.535617	0.970994	0.816786	1.2942	0.649142	1.29175	0.807447
DG29	0.200264	0.0484485	0.0617534	0.0832645	0.136174	0.066018	0.047331	0.0705592	0.0461425	0.067197	0.163949
DG30	4.73091	2.67126	2.75659	4.16323	2.93897	3.00599	1.97185	3.50597	2.53561	4.74293	3.05398
DG31	0.437269	0.168561	0.110216	0.550551	0.379017	0.252394	0.100795	0.28684	0.270392	0.485384	0.440646
DG32	9.41977	9.16732	8.03838	19.9581	9.69182	9.75419	9.45651	10.5991	12.0088	21.2374	9.8379
DG33	0.213592	0.232518	0.123108	0.976205	0.761647	0.614942	0.222428	0.537759	0.306065	0.945977	0.585209
DG34	9.27615	6.91918	6.54242	30.1475	9.68348	9.02443	9.13428	8.88378	7.96688	36.2081	8.20514
DG35	0.124746	0.0881975	0.0813898	0.890069	0.402469	0.327778	0.0865972	0.321312	0.128795	0.939453	0.380765
DG36	3.76515	2.88718	2.18492	35.0285	4.23652	4.43996	4.91957	4.77245	3.63941	32.8156	3.52517
DG37	0.0352508	0.0261481	0.0301299	0.406273	0.0378175	0.00618923	0.0114511	0.0175634	0.0094934	0.409053	0.045466
DG38	0.309972	0.408438	0.299551	4.01967	0.338422	0.277065	0.225181	0.293654	0.263196	3.58819	0.325736
DG40	0.0104626	0.0111455	0.028226	0.380433	0.0219911	0.00133909	0.00592197	4.72032e-08	0.000867968	0.386872	0.0234758
DG42	0.00212401	4.31147e-08	4.23054e-08	0.0250511	5.18543e-08	5.7857e-08	0.000943233	4.72032e-08	4.13692e-08	0.0215944	5.20745e-08
DG47	0.0325353	0.0164802	0.0174053	0.0412734	0.0277643	0.00185942	0.000826818	0.00555573	5.62575e-06	0.0249216	0.00934475
DG48	0.112715	0.0554792	0.0759168	0.0368948	0.0692974	0.06221	0.0154643	0.140488	0.0621658	0.0341856	0.0616905
DG49	0.042208	0.0126432	0.0507963	4.92e-08	0.0118017	0.000126005	0.0823472	5.73529e-05	0.00989824	4.47173e-08	0.00850904
DG50	0.0689877	0.0238397	0.000992613	4.92e-08	5.18543e-08	5.7857e-08	6.62479e-08	4.72032e-08	4.13692e-08	4.47173e-08	5.20745e-08
DG51	0.133499	0.166689	0.225281	0.422065	0.186861	0.0541911	0.0533517	0.0764418	0.0905327	0.275312	0.0673126
DG53	5.47929e-08	4.31147e-08	4.23054e-08	4.92e-08	5.18543e-08	0.00494283	0.00603055	4.72032e-08	0.0170202	0.00165393	0.00281569
DG54	4.37042e-05	4.31147e-08	4.23054e-08	0.00672693	5.18543e-08	2.74082e-05	0.00458684	0.0137733	0.00123489	0.0235516	0.00550761
DG56	0.00199694	0.00230458	0.00128476	2.76006e-05	4.23259e-05	5.7857e-08	2.96013e-05	4.72032e-08	2.11913e-05	6.37073e-05	5.20745e-08
LPC12	0.0054051	0.0428989	0.00449732	4.92e-08	0.000248295	0.000356705	6.62479e-08	0.00247311	0.000229551	4.47173e-08	0.00743407
LPC14	0.0991649	0.679337	0.312925	0.165823	0.16991	0.0726181	0.0731569	0.174232	0.257113	0.275964	0.1717
LPC15	0.087676	0.60405	0.0822075	0.423469	0.366694	0.256321	0.0367344	0.318686	0.0300568	0.369084	0.247674
LPC16	1.90077	7.54819	3.91928	3.9413	4.16864	3.17719	2.31964	6.501	4.77409	4.28138	4.21205
LPC17	0.0184115	0.0572379	0.0119782	0.0559827	0.0944743	0.0527933	0.0638828	0.0695917	0.0614094	0.0435098	0.0796689
LPC18	1.79756	8.51199	5.71519	5.7864	6.1762	5.02791	3.70784	7.12045	5.95102	4.50228	4.42486
LPC19	0.000643771	0.0326009	0.00691274	0.0235908	0.0254759	0.0150169	0.00935192	0.0248265	0.0159941	0.0100916	0.0178475
LPC20	0.0347745	0.143149	0.0449585	0.110457	0.147109	0.159685	0.0930531	0.153305	0.0905327	0.0520276	0.0863492
LPC34	7.88581e-05	0.00924654	0.0870265	0.0216057	0.0649852	0.0583272	0.036631	0.0716212	0.0535954	0.0102427	0.0622223
LPC36	0.014841	0.00600156	0.0869179	0.0594132	0.111209	0.0987595	0.0948676	0.0785078	0.103207	0.0416882	0.077493
LPC38	0.00253578	4.31147e-08	0.026108	0.000479468	5.18543e-08	5.7857e-08	6.62479e-08	4.72032e-08	4.13692e-08	0.000349509	0.000573343
LPE14	0.00513846	0.0205835	0.00912172	0.00972402	0.0103706	0.00703825	0.00700104	0.015948	0.0168994	0.0181055	0.0135452
LPE16	0.445766	1.19414	0.76534	0.65349	0.666918	0.538268	0.344202	0.942851	0.730297	0.838994	0.664018
LPE17	0.00474723	0.00901343	0.00364806	0.0160787	0.0200478	0.0117431	0.00229017	0.0148752	0.00439975	0.0129175	0.0114338
LPE18	0.855352	2.67961	2.46267	1.8591	1.94426	1.57002	0.932688	2.14175	2.6858	1.28522	1.1396
LPE19	0.000197811	0.000497608	0.000695809	0.000645547	0.00108874	1.13815e-05	0.000129103	0.000687638	0.00107979	7.58532e-05	0.000305342
LPE20	0.101523	0.256639	0.0560426	0.44001	0.174809	0.18555	0.132413	0.249297	0.153906	0.164404	0.119278
LPE21	0.00212951	0.00433529	0.000141741	0.00515971	0.00457631	0.00475981	0.00133148	0.00521861	0.00277618	0.00101533	0.00250234
LPE22	0.00182696	0.00265821	0.000417058	0.00306347	0.0019307	0.002492	0.00094538	0.00258262	0.00362771	0.00130252	0.00141527
LPEt16	5.47929e-08	0.00542088	4.23054e-08	0.00160509	0.0111965	0.00554757	6.62479e-08	0.00791965	4.13692e-08	0.00472905	0.0029561
LPEt18	5.47929e-08	0.0026733	4.23054e-08	0.00547943	0.0139428	0.00590444	6.62479e-08	0.00963079	0.000224337	0.00584079	0.0103663
LPG16	0.000460903	0.000519564	4.23054e-08	0.00137191	0.00172748	0.000607661	6.62479e-08	0.00309462	4.13692e-08	0.00414985	0.000563265
LPG18	5.47929e-08	0.00278511	4.23054e-08	0.00247563	0.00163692	0.00228595	6.62479e-08	0.00456528	4.13692e-08	0.00350151	0.000915679
LPI16	0.00207258	0.00324557	0.0195564	0.00746275	0.00214476	0.00275813	0.000139975	0.00585669	0.00366249	0.00261883	0.00129787
LPI18	0.0194253	0.030696	0.0339465	0.0503894	0.0242527	0.0297132	0.00503705	0.0420086	0.0198568	0.0243997	0.0168152
LPI19	0.0010857	0.00092824	0.000854406	0.000878231	0.000555008	0.000836778	0.00629958	0.00112981	0.00177411	0.000712328	0.000322412
LPI20	0.00214847	0.00178224	0.00142085	0.000839922	0.000890676	0.000552431	6.62479e-08	0.000663123	0.00123184	0.000105043	0.000822667
LPS18	0.0106845	0.0175584	0.0546076	0.0209936	0.0225212	0.0243292	0.00290462	0.0371723	0.0088291	0.00898761	0.00869051
LPS20	0.0144665	0.0120777	0.00549991	0.0168519	0.00620584	0.0142338	0.00425127	0.0100938	0.0116058	0.00595893	0.00411519
LSMd18	0.0163876	0.00225189	4.23054e-08	4.92e-08	0.00060646	0.00137953	6.62479e-08	0.002944	4.13692e-08	4.47173e-08	0.00171842
LdMePE16	0.00188861	0.00555833	0.125294	0.00471091	0.00243185	0.00487521	0.022013	0.00528451	0.0832901	0.00476335	0.00474716
LdMePE18	0.00216343	0.0212462	0.00344602	0.00730714	0.0121655	0.0093612	0.00153381	0.00957826	0.00431569	0.00896939	0.00863372
MG14	5.47929e-08	4.31147e-08	4.23054e-08	0.0256971	0.00020125	5.7857e-08	6.62479e-08	6.09546e-06	4.13692e-08	0.0231601	0.000152966
MG16	0.0183061	0.002771	0.000404715	0.554857	0.00670787	0.00157503	0.000727947	0.00238529	0.000107339	0.648483	0.00180824
MG17	1.14313	0.239655	0.000836165	0.0753687	2.16365	1.51094	6.62479e-08	1.32224	4.13692e-08	0.0431887	1.63343
MG18	0.102512	0.0618478	0.0539441	2.9103	0.0904607	0.08765	0.0370176	0.0410166	0.0385669	3.76786	0.0608514
MG19	1.21508	0.254752	0.00180501	0.00925959	2.30739	1.80637	6.62479e-08	1.63214	4.13692e-08	0.00867689	1.90694
MG20	0.00752731	1.60534e-05	0.00103914	0.0803933	0.000444464	0.0014473	6.62479e-08	0.000250941	4.13692e-08	0.0919881	0.00322576
MG23	0.187019	0.847583	0.290007	1.17001	1.22556	0.951724	0.904261	0.971763	0.903582	1.14822	0.929817
MG25	0.166274	0.180528	0.042464	0.241898	0.425165	0.362118	0.392406	0.21142	0.249267	0.203548	0.22868
MG26	7.33905e-06	0.0109816	0.000511152	0.0106153	0.0365522	0.0110831	0.0282223	0.00721248	0.0132781	0.00863821	0.0164156
MG27	0.0227827	0.00147939	0.0112949	0.0213904	0.00189465	5.7857e-08	6.62479e-08	4.72032e-08	5.27788e-06	0.00589487	0.00170401
MG32	0.502019	0.384329	0.0164178	0.00875713	0.00968348	0.0120706	0.279323	0.00637099	0.0121314	0.435802	0.407978
MG36	5.47929e-08	4.31147e-08	0.00409424	0.649607	0.0316982	0.0134212	0.0092351	0.0179053	0.00959647	0.305322	0.0111681
MGDG26	5.47929e-08	4.31147e-08	4.23054e-08	0.00204893	5.18543e-08	5.7857e-08	6.62479e-08	4.72032e-08	4.13692e-08	0.00208268	5.20745e-08
MGDG32	0.0246746	0.0913826	0.00435584	0.168682	0.1733	0.176417	0.0736099	0.183874	0.114107	0.159185	0.128464
MGDG34	0.00581619	0.0530174	0.0019596	0.240462	0.279156	0.494641	0.423334	0.391162	0.250474	0.189848	0.232479
MGDG36	0.000274944	0.183044	2.24126e-05	0.825467	0.771652	1.20706	1.19848	1.01234	0.857043	0.593682	0.641217
MGDG38	5.47929e-08	4.31147e-08	4.23054e-08	0.00228185	0.00200951	0.00261044	0.00784506	0.00286015	0.00568405	0.00115428	0.00251793
MGMG16	5.47929e-08	4.31147e-08	4.23054e-08	6.37254e-05	0.00215276	0.000349569	6.62479e-08	0.000188392	4.13692e-08	4.47173e-08	2.70482e-05
MGMG18	5.47929e-08	0.000141591	4.23054e-08	0.00212178	0.022009	0.00225667	1.28767e-06	0.00446893	8.27384e-08	0.00164713	0.00275658
OAHFA34	1.69147e-05	0.000649353	4.23054e-08	0.00370559	0.000917694	0.000705883	6.62479e-08	0.000963367	4.13692e-08	0.000355381	0.0035734
OAHFA36	0.00240042	0.0010396	0.000549938	0.00484575	0.00106304	0.000778012	0.00140225	0.00193797	0.000819144	0.0073721	0.000498052
OAHFA38	0.000173521	0.000238983	0.000341279	0.00219432	0.000638069	0.000290109	6.62479e-08	0.0012714	4.13692e-08	0.00140436	0.00030523
OAHFA40	0.00102565	4.30963e-05	0.000380899	0.00088662	0.00137397	0.000829924	0.0010706	0.00616767	0.000461681	0.00137743	0.00030591
OAHFA42	5.47929e-08	4.31147e-08	0.00023209	4.68204e-06	5.18543e-08	0.00012805	6.62479e-08	0.00119352	4.13692e-08	0.000122091	0.000261342
OAHFA48	0.00593383	0.00076473	0.00103899	0.00205033	0.0137182	0.00287968	0.00127191	0.00323527	0.00043979	0.00114453	0.0123429
OAHFA50	0.00194539	0.000512178	6.80137e-06	0.000430018	0.0132165	0.00163318	0.000673809	0.000808288	0.000557696	0.00078611	0.0125544
OAHFA52	0.000547247	0.000358561	4.23054e-08	0.000459652	0.00562955	0.000856986	0.000417341	0.000486954	4.13692e-08	0.000548716	0.00341475
PA24	0.038211	0.0184302	0.00109668	0.00205033	0.000743637	0.000285248	6.62479e-08	0.00424467	0.000506056	0.00142539	0.00318503
PA26	0.0232624	0.0365458	0.00385335	0.000918897	0.000940111	0.000772151	0.000141615	0.00352657	0.00146659	0.0135765	0.00461162
PA28	0.00188931	0.00208966	4.23054e-08	4.92e-08	5.18543e-08	5.7857e-08	6.62479e-08	4.72032e-08	4.13692e-08	0.000304788	0.000137155
PA34	0.11911	0.193108	0.0672758	0.144995	0.0862435	0.0353677	0.0353358	0.12878	0.0444817	0.198981	0.141311
PA36	0.127903	0.194995	0.0746823	0.20529	0.22847	0.264203	0.282223	0.235523	0.239006	0.15788	0.170181
PA38	0.0617132	0.0239674	0.0922525	0.0241832	0.0113844	0.0188402	0.0114645	0.00797104	0.00836449	0.00605569	0.00668875
PA41	0.000759385	0.000933293	0.000901928	0.000519868	5.18543e-08	0.000336524	6.62479e-08	0.000540681	7.17743e-06	5.74949e-05	1.69687e-05
PA42	1.00724	1.67947	0.857921	0.947493	0.945652	0.886303	0.218433	1.26714	0.353077	1.08298	1.18519
PA43	5.07245e-05	5.46133e-05	0.00027966	4.92e-08	0.000365113	5.7857e-08	6.62479e-08	6.46126e-05	4.13692e-08	4.47173e-08	8.33981e-05
PA44	0.301372	0.0685628	0.7962	0.0775221	0.0640017	0.077235	0.585709	0.0771305	0.908657	0.991645	0.0672366
PA45	4.9752e-06	0.0181786	0.00434499	0.0326598	0.0352539	0.0289526	0.00546672	0.0271334	0.00294092	0.023943	0.0218804
PA47	0.00166426	0.000125898	0.00125386	0.000713958	0.000172145	0.000171658	0.000159007	0.000145502	4.13692e-08	4.47173e-08	5.20745e-08
PC14	5.47929e-08	4.31147e-08	8.80725e-05	0.0479489	5.18543e-08	5.7857e-08	0.000113361	4.72032e-08	5.63153e-05	0.0334028	5.20745e-08
PC16	0.00275633	0.000752852	4.23054e-08	4.92e-08	0.0205017	0.0109733	6.62479e-08	0.00950358	4.13692e-08	4.47173e-08	0.0120038
PC17	5.47929e-08	4.31147e-08	4.23054e-08	4.92e-08	0.000614564	0.00310323	6.62479e-08	0.00225203	4.13692e-08	4.47173e-08	0.00292345
PC18	0.000925581	4.31147e-08	4.23054e-08	4.92e-08	0.00138962	0.00769359	6.62479e-08	0.00360838	4.13692e-08	2.99546e-06	0.00318115
PC24	0.724309	1.24545	0.374646	0.0389214	0.0610554	0.069447	0.0139544	0.239655	0.0653512	0.133089	0.246914
PC25	0.0623603	0.0308438	0.0110763	0.00310456	0.00215362	5.7857e-08	6.62479e-08	0.00468621	0.00224834	0.0038265	0.0112893
PC26	2.81387	3.38411	2.25281	0.458673	0.533348	0.551196	0.432159	1.16384	1.63562	1.32437	1.38272
PC27	0.52359	0.439053	0.0927666	0.149302	0.16686	0.10298	0.0192475	0.181808	0.0892571	0.212682	0.0790125
PC28	10.3921	13.8384	9.19642	2.44769	2.80669	1.4012	1.16146	5.97761	2.18486	6.58922	6.51853
PC29	10.0724	8.23752	8.91207	6.44582	6.28669	5.52663	5.64325	6.88665	6.76042	7.30885	7.85613
PC30	29.1779	33.7782	24.5032	12.705	6.27156	10.298	8.00276	19.7647	18.1669	21.3334	21.8804
PC31	28.2186	34.2814	44.2539	34.885	41.3817	39.6726	55.8646	35.3974	44.18	34.1204	39.9621
PC32	80.7388	79.256	84.5577	46.5133	59.9922	50.3083	52.4818	58.6054	79.0652	53.7576	63.058
PC33	21.9833	17.2979	23.454	19.6676	22.4687	22.453	31.7017	18.5251	22.935	17.1581	19.6012
PC34	146.658	150.335	182.956	158.633	164.922	165.443	188.471	162.525	190.119	148.747	158.025
PC35	2.61402	6.35306	5.10264	8.82891	9.75913	10.9733	10.1484	9.15925	9.71718	8.35069	7.7493
PC36	55.7547	74.2472	81.2778	97.1632	95.8316	87.0476	118.573	76.1553	97.7832	77.4905	74.0974
PC37	0.887327	2.65445	2.20344	3.50285	3.14713	2.431	6.11805	2.58249	3.1445	1.1156	1.61824
PC38	4.96424	2.77396	5.06112	4.62262	3.69183	3.66339	2.9962	5.23385	5.13622	3.39899	3.57835
PC39	0.15579	0.157254	0.0256759	0.129204	0.136174	0.135219	0.0776275	0.150818	0.153906	0.0743219	0.102788
PC40	0.00896524	0.0145169	0.00454085	0.0130898	0.0110966	0.0211597	0.0152854	0.0250727	0.023457	0.0103828	0.0130792
PC42	0.000124102	4.31147e-08	0.00354717	0.0206726	0.0523513	0.0508991	0.00545768	0.0181808	0.0814794	0.0932929	0.0535614
PC44	5.47929e-08	4.31147e-08	4.23054e-08	4.92e-08	5.18543e-08	5.7857e-08	6.62479e-08	0.00151721	4.13692e-08	4.47173e-08	5.20745e-08
PC51	5.47929e-08	0.00222379	4.23054e-08	4.92e-08	0.000337366	0.00034686	0.000105669	0.000349238	0.000416978	4.47173e-08	5.20745e-08
PC53	5.47929e-08	0.00212254	4.23054e-08	4.92e-08	5.18543e-08	5.7857e-08	6.62479e-08	4.72032e-08	4.13692e-08	4.47173e-08	5.20745e-08
PE16	0.887327	2.56639	1.7361	1.46431	1.40713	1.11421	0.755412	1.90072	1.79085	1.75495	1.36752
PE17	0.00359325	0.015977	0.000345448	0.0190216	0.0382043	0.0167131	0.00116531	0.0271334	0.00863078	0.019311	0.0183856
PE18	0.461458	0.817721	2.28019	0.677938	0.72351	0.656947	0.912739	0.804383	1.69434	0.637992	0.557638
PE19	0.0240864	0.0404457	0.000345863	0.0368948	0.0983478	0.0777414	0.0114049	0.0497216	0.0125539	0.0110908	0.0367712
PE20	0.116712	0.235252	0.091347	0.251947	0.209556	0.17304	0.0718122	0.218995	0.114071	0.106341	0.11624
PE21	0.00133757	0.0103159	0.00403419	0.0138535	0.0142983	0.0146873	0.00267759	0.0171478	0.013942	0.00392469	0.00535619
PE22	5.47929e-08	0.00666757	0.000801928	0.00620656	0.00877565	0.0103824	0.00305083	0.0128092	0.00347243	0.00257392	0.00418585
PE24	0.17187	0.158512	0.0603631	0.0303129	0.0174456	0.0351053	0.00337286	0.0431868	0.0233574	0.0756782	0.0430898
PE26	0.296575	0.279912	0.124676	0.16294	0.0991043	0.229595	0.0818639	0.179742	0.111053	0.208767	0.130674
PE27	0.0259803	0.0186818	0.00901126	0.00790705	0.0050811	0.0036769	1.3669e-05	0.0101922	0.0039104	0.0118736	0.0076423
PE28	1.12715	1.26432	0.565981	0.348132	0.414574	0.525029	0.17204	0.575035	0.306001	0.45994	0.586516
PE29	0.0439731	0.0354136	0.0092871	0.00746962	0.027613	0.0143497	0.0160442	0.020109	0.0269787	0.025835	0.0420134
PE30	4.0849	2.52864	7.09791	0.947493	1.29365	1.2155	1.44011	1.36356	1.93136	1.43528	1.62583
PE31	0.286183	0.20443	0.20121	0.228977	0.245869	0.156158	0.313151	0.26307	0.161752	0.279226	0.253752
PE32	25.1809	20.0656	30.1815	16.294	19.9722	19.4987	14.6911	18.9383	22.9625	19.5067	20.133
PE33	0.740129	1.42787	0.677349	1.2458	1.72487	1.6882	1.43044	1.76987	1.07432	0.95034	1.67142
PE34	69.8958	73.5949	101.901	73.3022	82.9087	82.0463	93.3938	67.3687	86.9754	86.6137	80.7956
PE35	76.582	72.3368	70.3619	55.4858	63.9261	56.3858	22.2299	66.9382	25.8924	58.9768	68.6801
PE36	51.0356	56.926	58.9099	60.8692	69.0704	68.7301	75.195	61.911	53.535	51.4089	60.3312
PE37	47.484	53.5293	51.7839	50.7483	56.2852	60.5218	62.7269	59.7073	53.1729	56.4324	54.473
PE38	4.86831	9.30944	8.82609	7.53687	13.0878	11.0577	13.6279	7.36872	10.3207	6.7197	8.58501
PE39	17.5067	21.6381	21.7875	22.9695	22.9983	20.596	22.6165	20.109	23.7196	20.2243	20.6648
PE40	2.55007	3.52249	0.268486	4.78053	5.96139	6.97225	4.4943	5.65394	4.22486	3.56209	3.85946
PE41	0.267584	0.225012	0.0494374	0.1865	0.198177	0.216024	0.219399	0.21382	0.246852	0.171626	0.0523149
PE42	0.0168672	0.0550389	0.0100605	0.0760865	0.0847304	0.101292	0.0637901	0.0971018	0.0663906	0.0457983	0.0510542
PE43	1.52862	1.34086	0.893038	1.07974	1.33904	0.875826	1.01484	1.42964	1.17692	1.02639	1.22102
PE44	0.00397887	0.0141052	0.00320042	0.0236013	0.0212709	0.0255821	0.00296688	0.0214264	0.00397454	0.018391	0.0169535
PE45	0.293499	0.797612	0.119994	0.732732	0.728467	0.661227	0.586675	0.655829	0.76651	0.607672	0.740362
PE46	0.000573233	0.0603855	4.23054e-08	0.0539066	0.050233	0.0369715	0.0531584	0.0539225	0.0395326	0.0494518	0.0640457
PE49	0.0103122	4.31147e-08	4.23054e-08	4.92e-08	5.18543e-08	5.7857e-08	6.62479e-08	4.72032e-08	4.13692e-08	4.47173e-08	5.20745e-08
PE50	0.000397637	0.000230274	0.00126733	0.00256286	0.0010037	0.00262987	0.0022144	0.00215919	0.0025027	0.000734569	0.00118087
PE52	1.50726e-05	0.000732783	0.0067893	0.00463446	0.00477583	0.00644905	0.0123714	0.0056857	0.00876887	0.00450278	0.00208742
PE54	4.43665e-06	9.68339e-06	8.32474e-06	0.00136605	0.00192965	0.0017938	0.00183549	0.000969943	0.00186877	0.000551576	5.20745e-08
PE55	5.47929e-08	4.31147e-08	1.25696e-05	0.00690456	0.00432424	0.00894744	6.62479e-08	0.00452415	5.1115e-05	0.0161795	0.00790125
PEt29	5.47929e-08	4.31147e-08	4.23054e-08	0.0648171	5.18543e-08	5.7857e-08	6.62479e-08	4.72032e-08	4.13692e-08	0.0652398	5.20745e-08
PEt30	5.47929e-08	0.00322407	4.23054e-08	4.92e-08	0.000742288	5.7857e-08	6.62479e-08	0.000454685	1.76588e-06	0.000307345	7.94691e-06
PEt32	0.000373828	0.000164853	0.00401754	0.000302959	0.000208082	0.000305983	0.000557515	7.13263e-06	0.00086604	7.46886e-06	0.000426954
PEt33	5.47929e-08	0.00049466	4.23054e-08	0.401967	0.00202223	5.7857e-08	6.62479e-08	4.72032e-08	4.13692e-08	0.450155	5.20745e-08
PEt34	0.000566445	0.0310975	0.00433839	0.031137	0.0424143	0.0787727	0.00780113	0.0359202	0.0313377	0.0363868	0.0318498
PEt36	0.000300536	0.00842881	4.23054e-08	0.0102645	0.0164165	0.0244788	0.00450165	0.00674854	0.0116485	0.00750258	0.00790125
PEt37	3.64068e-05	0.0113852	4.23054e-08	0.168682	0.051973	0.0104668	6.62479e-08	0.00225989	0.00034506	0.145485	0.0124597
PG24	0.00294201	0.00286215	4.23054e-08	4.92e-08	3.52539e-06	0.000767068	6.62479e-08	0.00068376	4.13692e-08	0.00098618	0.00135847
PG26	0.00348421	0.0050987	4.23054e-08	0.000341776	0.000601348	0.000969259	6.62479e-08	0.00233015	0.000761792	0.00358444	0.00297456
PG28	0.000283977	0.0206317	4.23054e-08	0.021821	0.0149791	0.0143497	6.62479e-08	0.0150129	0.0011326	0.0548667	0.00995253
PG30	0.0222561	0.0286863	0.000263959	0.020807	0.0292823	0.0307809	8.27811e-06	0.0308882	0.0161311	0.0336768	0.0252277
PG31	5.47929e-08	0.000396641	4.23054e-08	0.000686953	0.000945152	0.000435101	6.62479e-08	0.00106732	1.06463e-06	0.000671989	5.24574e-05
PG32	0.244615	0.34637	0.089089	0.307935	0.403983	0.429646	0.142422	0.493773	0.280048	0.399267	0.352517
PG33	0.00771531	0.0114807	0.000671103	0.0300039	0.0243569	0.00656761	0.00053742	0.0246368	0.0179935	0.0415577	0.0102114
PG34	1.06871	1.72329	1.2658	1.7426	1.92156	1.56676	1.173	1.57099	1.98808	1.76184	1.32977
PG35	0.00220748	0.00203272	0.00556623	0.0207676	0.0272109	0.0154999	0.00395057	0.0211577	0.0728279	0.00700413	0.00526898
PG36	0.282848	0.666757	0.154216	1.16283	1.2407	1.05512	0.189437	0.798851	0.371788	0.985121	0.755177
PG37	0.00077922	0.00328752	0.0022061	0.0300039	0.0110452	0.00729235	0.00459887	0.00196638	0.0972439	0.0381653	0.00828082
PI24	0.000142328	0.00174244	1.48126e-06	4.92e-08	5.18543e-08	5.7857e-08	6.62479e-08	7.88141e-05	4.13692e-08	2.31396e-06	0.000286056
PI26	0.0147888	0.0131464	0.000121523	0.00304342	0.00243366	0.000190647	6.62479e-08	0.00239807	0.00102262	0.0163752	0.00631503
PI28	0.0655503	0.0603855	0.0027592	0.00601159	0.00617857	0.00393462	6.62479e-08	0.0122582	0.00977753	0.0330113	0.0192213
PI29	0.000829234	0.00385273	4.23054e-08	0.00659346	0.00251341	0.000139377	6.62479e-08	0.000715063	0.000327538	0.00874213	0.00360735
PI30	0.173469	0.215753	0.0771012	0.060583	0.0692076	0.0678063	0.0099298	0.121405	0.0674451	0.149399	0.122317
PI31	0.0182559	0.00443717	0.00370965	0.01997	0.0149598	0.0117646	0.00176097	0.00848382	0.00923976	0.0124017	0.00820312
PI32	3.09366	2.48461	0.528144	2.47028	2.81741	3.12749	0.568432	3.71879	1.68113	5.2368	2.14344
PI33	0.0555854	0.0253778	0.00637635	0.0724976	0.0638734	0.0478604	0.00958216	0.0465377	0.0235544	0.0751789	0.0467529
PI34	6.14493	6.21468	2.63002	5.72735	5.57952	5.11332	2.41126	6.69951	4.88602	5.90591	5.32191
PI35	0.165844	0.13644	0.029672	0.162566	0.138958	0.157002	0.0748682	0.163247	0.0918475	0.220152	0.175664
PI36	5.0122	7.674	2.90271	10.0474	9.02076	9.43259	5.05292	8.53702	6.92947	8.15497	7.2172
PI37	0.151085	0.220156	0.0666586	0.177296	0.20653	0.190766	0.0326683	0.253429	0.124332	0.17419	0.189862
PI38	0.376273	0.488116	0.0296496	0.301475	0.324548	0.363806	0.062147	0.411822	0.207622	0.343161	0.363913
PIP32	1.16986e-05	0.00125444	4.89646e-06	0.00193198	0.000415776	0.00183479	0.0035271	0.00179501	0.00148715	0.00011774	0.00136898
PIP38	0.00136693	0.00203136	0.000450124	0.00215773	0.00394403	0.00302086	0.0029967	0.00416271	0.000319635	0.00197843	0.00339754
PIP48	8.11845e-06	0.00158267	4.76858e-06	0.00684506	0.0149035	0.0138432	0.00446575	0.0106743	0.00633729	0.00315333	0.00331353
PIP50	0.00347733	0.00964762	0.00078661	0.00426909	0.0164897	0.0104751	0.0170879	0.0102611	0.00818882	0.00368941	0.0086806
PIP52	0.00178897	0.0223256	0.00472257	0.0372537	0.0290504	0.0372194	0.0511287	0.0207043	0.0267373	0.0189647	0.0234464
PIP54	0.000351352	0.0148054	0.00101562	0.0267021	0.0372209	0.0316537	0.0229117	0.0273564	0.0126297	0.00458277	0.00625842
PS24	0.0657185	0.00755316	0.00964646	0.042044	0.113013	0.0845406	0.00851228	0.0844424	0.0917398	0.0462956	0.0544234
PS26	0.102185	0.0283493	0.05578	0.389315	0.241783	0.147527	0.0498661	0.130996	0.108539	0.425714	0.103375
PS28	0.0044207	0.00732155	0.000823414	0.0021551	8.99096e-06	0.00273379	6.62479e-08	0.00169232	0.000202381	0.00143673	0.000380185
PS30	0.0230225	0.0366716	0.00630325	0.0106952	0.0058004	0.00536212	0.00123377	0.00971018	0.00772546	0.0248564	0.00942072
PS31	0.00265257	0.000514987	0.00107721	4.92e-08	3.57522e-06	0.000482902	0.000301776	0.000808837	8.57139e-05	0.000124051	0.000428186
PS32	0.227028	0.174237	0.014745	0.0961849	0.108939	0.106356	0.0540283	0.151506	0.117089	0.12787	0.121558
PS33	0.00756567	0.0352303	1.07394	0.0345135	0.0307837	0.0214757	0.0274955	0.0416863	0.0636426	0.0456463	0.0262246
PS34	3.21987	3.48961	1.19248	3.52151	2.47796	3.30186	1.61415	3.38273	1.7363	3.14666	2.87322
PS35	0.19488	0.288718	0.23886	0.493127	0.475852	0.395038	0.742285	0.42284	1.57527	0.423406	0.340361
PS36	8.55352	9.93845	4.09827	14.4995	13.8443	18.2325	9.10458	14.1176	9.53611	12.1998	10.2564
PS37	0.502819	0.51768	0.316011	0.3912	0.490226	0.710731	0.281256	0.383586	0.389291	0.494518	0.382147
PS38	2.66198	2.93121	1.75287	2.55536	3.02609	2.76864	1.47877	3.46399	1.28556	2.27687	2.72745
PS39	0.0238638	0.0334007	0.0374646	0.0269174	0.0246475	0.0264842	0.0126467	0.0345021	0.0162553	0.0270093	0.0241596
PS40	0.0241736	0.0374912	0.0101168	0.0209202	0.0368473	0.0569071	0.00998139	0.0560446	0.0190523	0.0224008	0.0333331
PS43	5.47929e-08	4.31147e-08	0.000155969	4.92e-08	5.18543e-08	5.7857e-08	0.00757471	4.72032e-08	0.00125107	4.47173e-08	5.20745e-08
SMd34	5.47929e-08	0.00374139	0.00957426	0.00663059	0.00383683	0.00407092	0.0328756	0.00771191	0.0437392	0.00596572	0.00503122
SMd36	5.47929e-08	0.000796622	0.00237387	0.00214486	2.87601e-05	0.000444136	0.00336884	0.0014297	0.00363955	0.00455426	0.00212775
SMd38	1.89563e-06	0.000228282	4.23054e-08	1.25335e-05	8.00921e-05	0.000183772	6.62479e-08	4.72032e-08	4.13692e-08	4.47173e-08	5.20745e-08
SMd39	0.00029777	4.31147e-08	3.85477e-05	2.42121e-05	4.77727e-07	5.7857e-08	0.00885672	8.88975e-07	0.00329761	0.000143085	7.71802e-07
SMd40	0.00130726	0.00019122	0.0143785	9.73524e-05	5.18543e-08	5.7857e-08	0.0171352	4.72032e-08	0.00894882	0.0028989	5.20745e-08
SMd41	0.00229058	0.00406633	0.0310456	0.00273987	1.89235e-05	0.0014564	0.00770323	1.20912e-05	0.00369564	4.47173e-08	5.20745e-08
SMd42	4.01622e-06	8.42824e-06	0.000986119	4.92e-08	5.18543e-08	5.7857e-08	0.000276363	5.55374e-06	5.84959e-06	4.47173e-08	5.20745e-08
Sod14	0.550783	0.368603	1.48747	3.51003	3.48756	0.0788388	0.00179076	0.192826	0.0214864	0.548787	0.74606
Sod16	3.08566	1.77383	15.3068	12.3461	10.44	0.677811	0.0242596	0.716212	0.0639001	2.5574	4.51283
Sod17	0.00058899	0.000143232	0.0018242	0.00167022	0.00740102	0.0103824	0.0016372	0.00445456	0.00386239	0.000332503	0.00190474
Sod18	0.00834641	0.0117626	0.0752995	0.0128424	0.0286722	0.044906	0.000542277	0.0319541	0.00185002	0.00117766	0.02302
Sod22	0.000394346	0.0377315	0.000555092	0.000482325	0.0146009	0.0101901	0.00153695	0.00189335	0.000850767	0.00154881	0.00277306
Sod24	0.0128702	4.31147e-08	2.22439e-05	0.00266847	0.0275374	0.0094539	0.0230997	7.62416e-06	0.0162355	1.30724e-05	0.0168661
Sod25	0.0111116	0.00259378	1.71461e-06	0.010767	0.0490226	0.00894744	0.000898332	0.0156327	0.00293894	0.012526	0.0379868
TG24	0.00735283	0.0137645	0.00213592	0.0167356	0.0104654	0.0084271	0.00103913	0.00840405	0.00101239	0.00916986	0.00570623
TG25	0.000572001	0.000381058	0.0106777	0.000614506	0.000542184	0.000419448	0.0368243	0.00323335	0.0207369	0.00106851	0.00109702
TG26	0.000411685	0.0293807	0.0167264	0.021821	0.0116603	0.00452808	0.013048	0.0156411	0.0211847	0.0127805	0.0128717
TG28	0.719846	0.469897	0.46661	0.811111	0.915391	0.67359	1.04384	0.648426	0.526297	1.23303	0.749099
TG30	0.00321174	0.00360697	0.201827	0.000291914	0.013693	0.00759842	0.146989	0.00991678	0.0336702	0.000478258	0.00971638
TG31	0.000809642	4.31147e-08	6.86896e-05	4.92e-08	5.18543e-08	0.00117416	6.62479e-08	0.00473992	4.13692e-08	4.47173e-08	9.23118e-05
TG32	0.0533995	0.0245316	0.0238243	0.00562287	0.0286722	0.00211381	0.215533	0.0115986	0.03229	0.00522844	0.0226401
TG33	0.0240866	0.032232	0.00198434	0.0296082	0.0287034	0.0413333	0.112025	0.065492	0.0397028	0.0308161	0.0395598
TG34	0.240477	0.36007	0.0926612	0.219646	0.136187	0.0992542	0.546815	0.210824	0.0922473	0.317718	0.287663
TG35	0.00542588	0.00899493	0.0128997	0.0266303	0.00686584	0.00204844	0.00286886	0.0206599	0.0109846	0.0335333	0.01717
TG36	8.12725	6.87115	2.61503	2.06008	0.316548	1.93921	0.730799	2.51712	0.991236	0.724162	1.48958
TG37	1.22307	0.684497	0.212937	0.348679	0.128609	0.0632683	0.153164	0.442223	0.176263	0.201298	0.320552
TG38	15.2684	13.0206	6.13506	4.79489	1.68704	6.95537	1.37245	6.3977	3.46438	1.04384	4.64198
TG39	2.34222	0.993845	0.527224	1.2705	0.389482	0.886937	0.434797	1.12907	0.645982	0.867689	1.09209
TG40	17.3754	12.8948	6.66586	6.82625	2.64783	8.52774	4.05948	8.21821	5.48961	4.95822	5.24977
TG41	3.61498	1.28243	0.870265	1.49813	0.786782	1.45554	0.744265	2.33776	1.31625	1.02487	1.83374
TG42	15.2684	8.61752	6.1042	6.14435	3.43461	10.8889	6.14704	8.67718	6.39764	6.91542	7.38463
TG43	4.64448	1.44674	1.37638	2.11033	1.57044	2.2031	1.21336	3.07288	1.9374	1.53966	2.94777
TG44	19.0256	12.2029	8.70265	7.46509	5.93113	13.6744	10.1484	13.5667	8.63078	8.41593	11.1681
TG45	6.52306	2.11978	2.28368	3.37365	3.73722	2.85542	1.7494	4.66915	2.72016	2.76617	5.72081
TG46	25.1809	17.1092	10.5543	10.4081	10.2887	17.6416	15.1743	19.7647	13.0971	12.4608	17.0181
TG47	11.0316	3.94393	3.82053	5.64189	7.26261	5.21653	3.42147	7.85078	4.98533	4.5994	7.52898
TG48	25.9004	18.3044	11.9121	12.059	13.3148	20.7648	20.4901	20.5222	17.6237	19.311	21.8804
TG49	9.98728	4.12134	4.84776	5.80275	8.27925	5.30811	4.24528	8.54307	6.41007	5.19107	10.947
TG50	21.5514	18.6526	8.25358	13.351	18.5258	29.1883	32.1479	24.9992	31.8855	21.9858	26.9196
TG51	5.21663	3.09426	3.70182	4.39292	7.36929	3.46965	3.10252	6.05549	4.76806	4.44935	7.45873
TG52	10.9517	11.2594	4.23504	10.5516	15.2061	17.5572	15.7542	16.5968	18.7101	16.2447	20.6648
TG53	1.60815	2.80812	1.73398	3.35929	4.14646	3.47768	3.40277	3.05044	3.29539	3.69257	4.45031
TG54	2.86359	2.76767	1.21741	3.59603	5.7193	3.03875	3.23889	4.91018	5.03965	3.37942	5.1738
TG55	0.390295	1.01258	0.239158	0.739332	1.20078	0.816979	0.701946	0.840454	0.82083	1.1417	1.41651
TG56	0.617132	0.755937	0.085693	0.875713	0.746961	0.829676	1.03817	0.818499	0.94154	0.955222	0.818144
TG57	0.0578761	0.321427	0.0215402	0.285683	0.0654914	0.0188892	0.14981	0.0110992	0.23116	0.167014	0.0662489
TG58	0.0837466	0.125723	0.0455595	0.324229	0.0747025	0.0280085	0.132409	0.0389712	0.045077	0.204005	0.122162
TG59	0.0182262	0.0299532	0.00227955	0.122026	0.00519547	0.00232132	0.010599	0.00496254	0.0474995	0.0952501	0.00434305
TG60	0.0613277	0.102762	0.00129888	0.0715883	0.00309034	0.00349335	0.0398504	0.0249364	0.0277634	0.0570007	0.0419477
TG61	0.00670275	0.0291691	0.000286786	0.0592901	0.00163551	5.7857e-08	0.00738102	0.00110857	0.00183781	0.0306035	0.00315743
TG62	0.00741771	0.00117071	4.23054e-08	0.012859	0.00215509	5.7857e-08	0.0109906	0.00794833	0.00827334	0.0135079	0.00481081
TG65	5.47929e-08	0.004829	0.000230481	0.00359143	0.00251742	0.00412883	0.00221419	0.00107096	0.00413517	0.00603564	0.00149982
dMePE26	0.00179456	0.00195013	0.000108516	4.92e-08	1.9166e-06	5.7857e-08	6.62479e-08	1.69982e-06	2.17494e-06	0.000943121	0.000806479
dMePE28	0.00869347	0.00916464	0.00465974	0.000708123	0.000813718	0.000750367	0.000399493	0.0021791	0.000478027	0.00454003	0.00297345
dMePE30	1.30106e-05	0.0174237	0.018146	0.00577273	0.00705259	0.00445936	0.001603	0.00950358	0.00219381	0.0103731	3.0719e-05
dMePE32	0.0571567	0.0635306	0.0783856	0.0455801	0.0489469	0.0455813	0.016914	0.0380143	0.0243835	0.0542795	0.0467237
dMePE34	0.0333347	0.0698208	0.0666586	0.0918781	0.0520487	0.0680343	0.0569902	0.0539225	0.0818268	0.0648483	0.0566763
dMePE36	0.577264	0.404952	0.563837	0.717886	0.964599	1.24294	1.06676	0.861742	0.853653	0.698366	0.649577
dMePE37	4.73262e-05	0.00221415	0.00117315	0.0155044	0.0158113	0.0159535	0.00772795	0.00576316	0.00633729	0.0133742	0.00620989
dMePE38	0.0326543	0.0818715	0.180318	0.124339	0.253711	0.316718	0.308919	0.206768	0.217832	0.136083	0.191067
dMePE48	4.56823e-06	1.77965e-06	0.00467628	4.92e-08	0.00139605	0.00139301	0.00435425	0.00106686	0.00270986	2.83776e-06	5.20745e-08
dMePE50	0.000962609	0.000372607	0.00703547	0.0044007	0.00618197	0.00801501	0.0206834	0.00378257	0.0155113	0.00396623	0.00270279
dMePE52	5.47929e-08	0.000589528	0.00110435	0.00148753	0.00241578	0.00538767	0.0258044	0.00354399	0.0175633	0.000310645	0.00150996
dMePE53	5.47929e-08	4.31147e-08	4.23054e-08	0.0294297	5.18543e-08	5.7857e-08	6.62479e-08	4.72032e-08	4.13692e-08	0.0381653	5.20745e-08
dMePE54	5.47929e-08	4.31147e-08	0.000102922	4.92e-08	5.58164e-06	0.00109439	0.00440781	0.00024281	0.00239142	4.47173e-08	5.20745e-08
